# Supplementary material for: Genotoxic effects of base and prime editing in human hematopoietic stem cells
Source: PubMed Central journal article supplement (PMC11180610; doi:10.1038/s41587-023-01915-4), 2023-09-07
Supplement: 41587_2023_1915_MOESM1_ESM.pdf [file 41587_2023_1915_MOESM1_ESM.pdf]

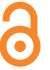

---

# Genotoxic effects of base and prime editing in human hematopoietic stem cells

---

In the format provided by the authors and unedited

## Supplementary Figures

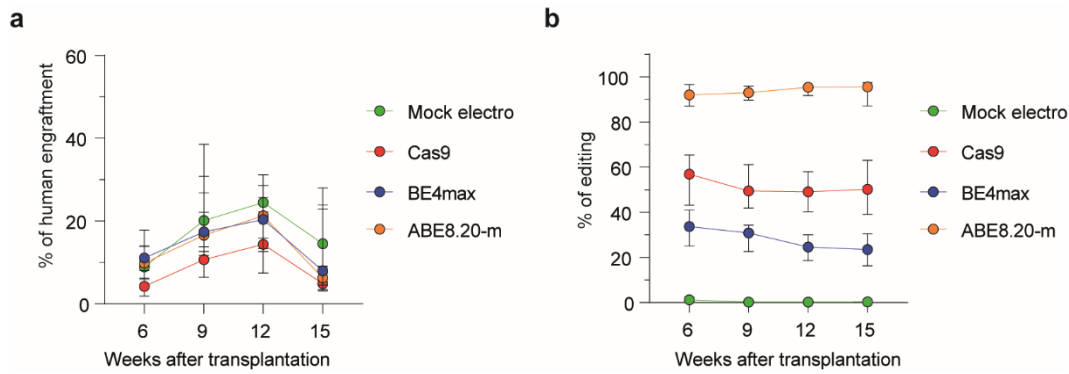

**Supplementary Fig. 1.** Percentage of human engraftment and editing of treated cells in xenotransplant experiments. **a,b**, Percentage of human cells engraftment (**a**) and editing of treated cells within human graft (**b**) in mice transplanted with CB/mPB HSPCs after B2M exon 2/AAVS1 editing at day 3 post-thawing from Fig. 3b (right), 3g, Extended Data Fig. 2g, 2n for (a) and from Fig. 3c (right), 3h, Extended Data Fig. 2h, 2o (n= 18,18,19,20). Median with IQR. LME followed by post hoc analysis. All statistical tests are two-tailed. n indicate independent animals.

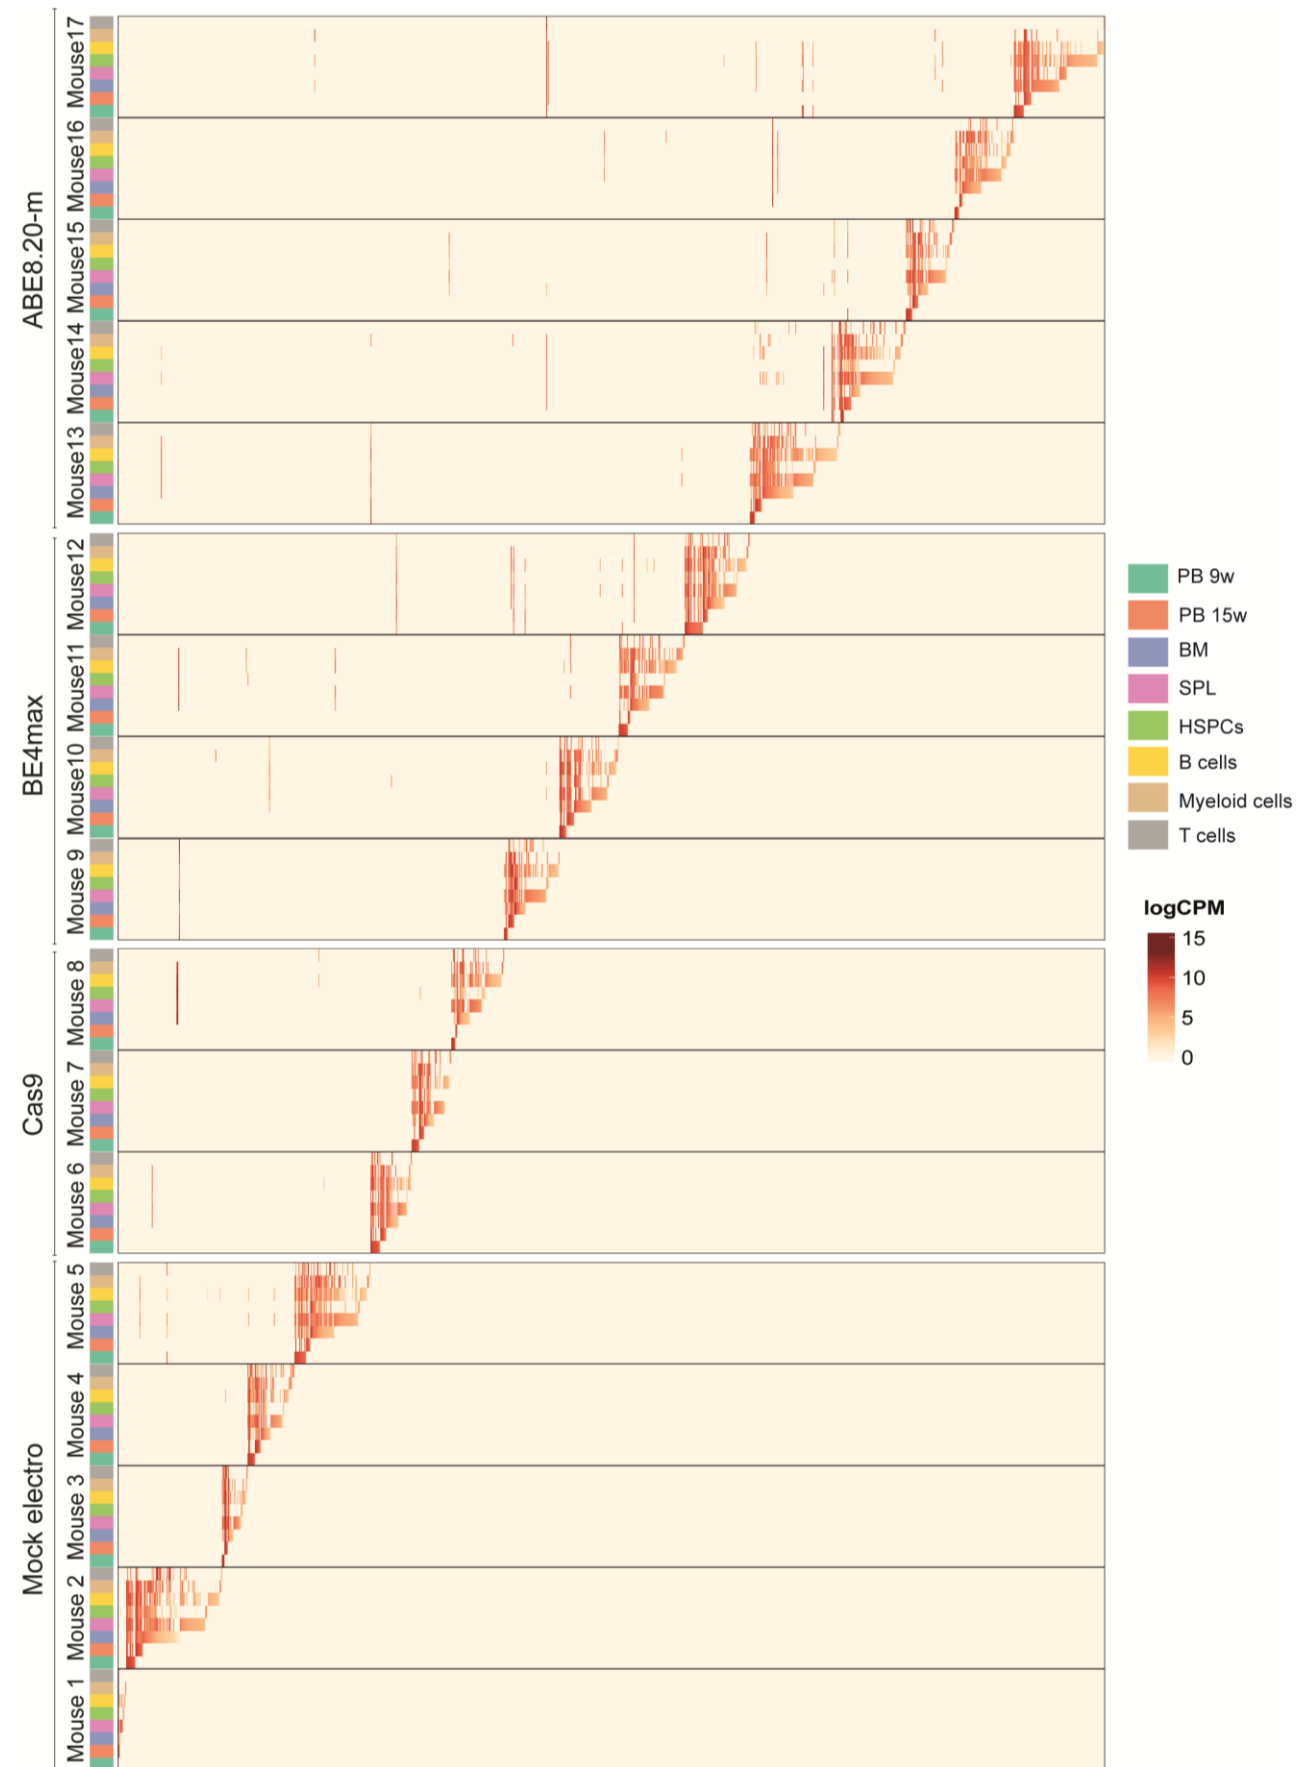

**Supplementary Fig. 2.** Abundance and inter-/intra-mouse sharing of BARs from clonal tracking analyses. Heatmap of the abundance (red-scaled palette) of BARs (rows) in PB at indicated times

after transplant, hematopoietic organs and lineages (columns) in mice from Fig. 3i. All statistical tests are two-tailed. n indicate independent animals.

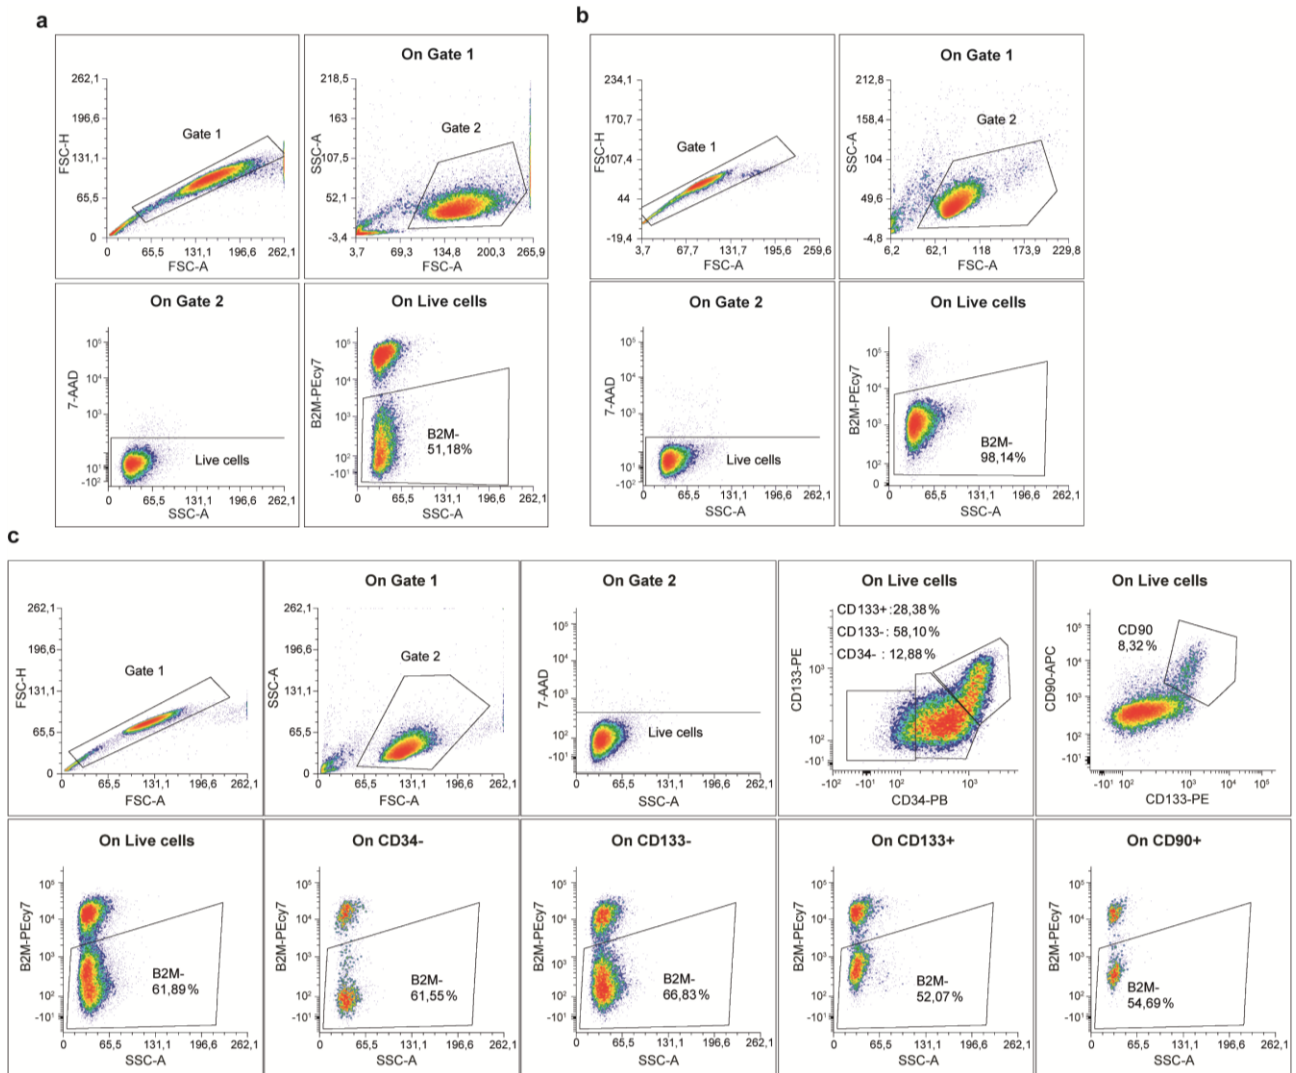

**Supplementary Fig. 3.** Gating strategies for flow cytometry analyses used for in vitro samples. Gating strategies for the analysis of: **a**, B-lymphoblastoid cells at 7 days after treatments; **b**, Human T cells at 7 days after treatments; **c**, Human HSPCs (CB-/mPB-derived) at 7 days after treatments.

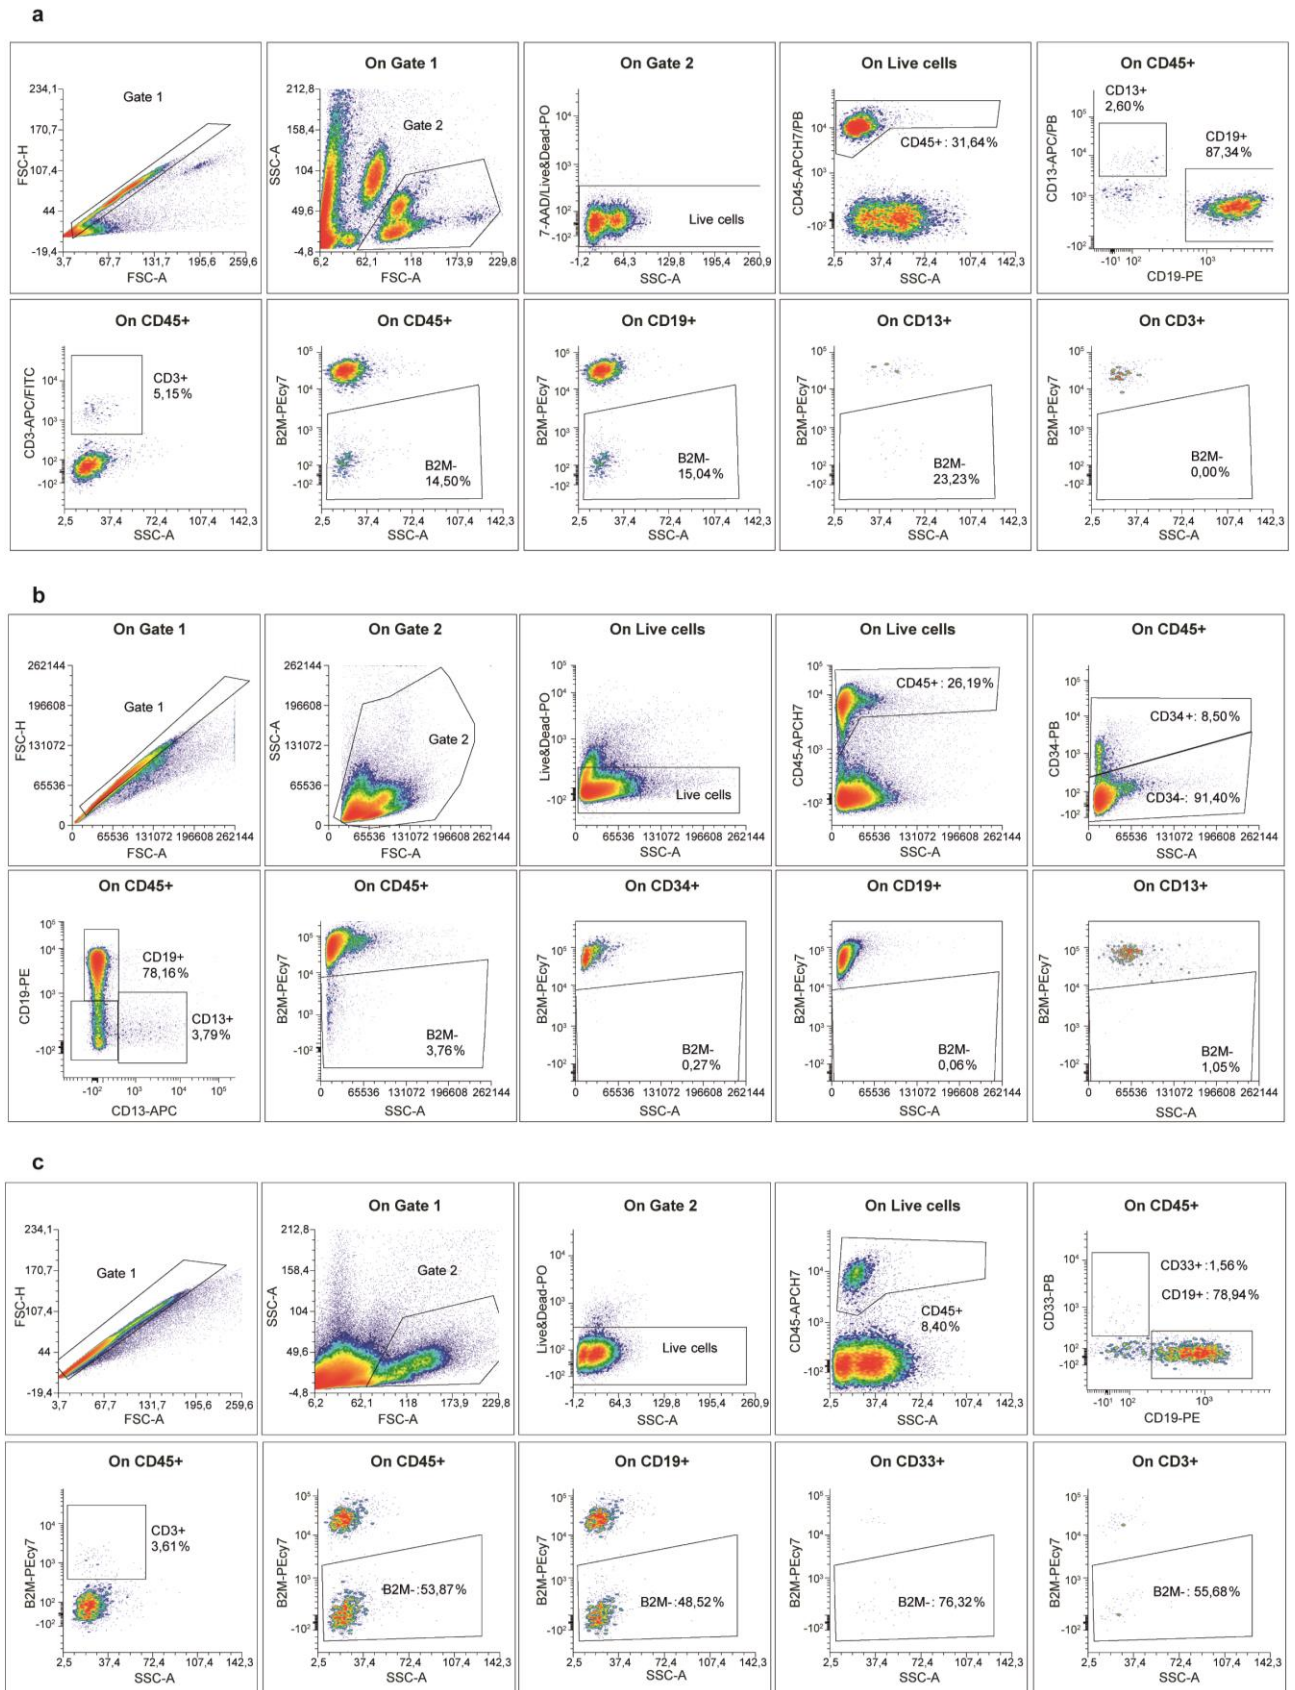

**Supplementary Fig. 4.** Gating strategies for flow cytometry analyses used for PB, BM and SPL of mice. Gating strategies for the analysis of: **a**, human cells in PB of transplanted NSG mice; **b**,

human cells within BM of transplanted NSG mice at the end of the experiment; **c**, human cells within SPL of transplanted NSG mice at the end of the experiment.
