# Supplementary material for: Genotoxic effects of base and prime editing in human hematopoietic stem cells
Source: PubMed Central journal article supplement (PMC11180610; doi:10.1038/s41587-023-01915-4), 2023-09-07

### Interchrom junction #1 Extended Data Fig 1m

### Interchrom junction #2 Fig 1s top

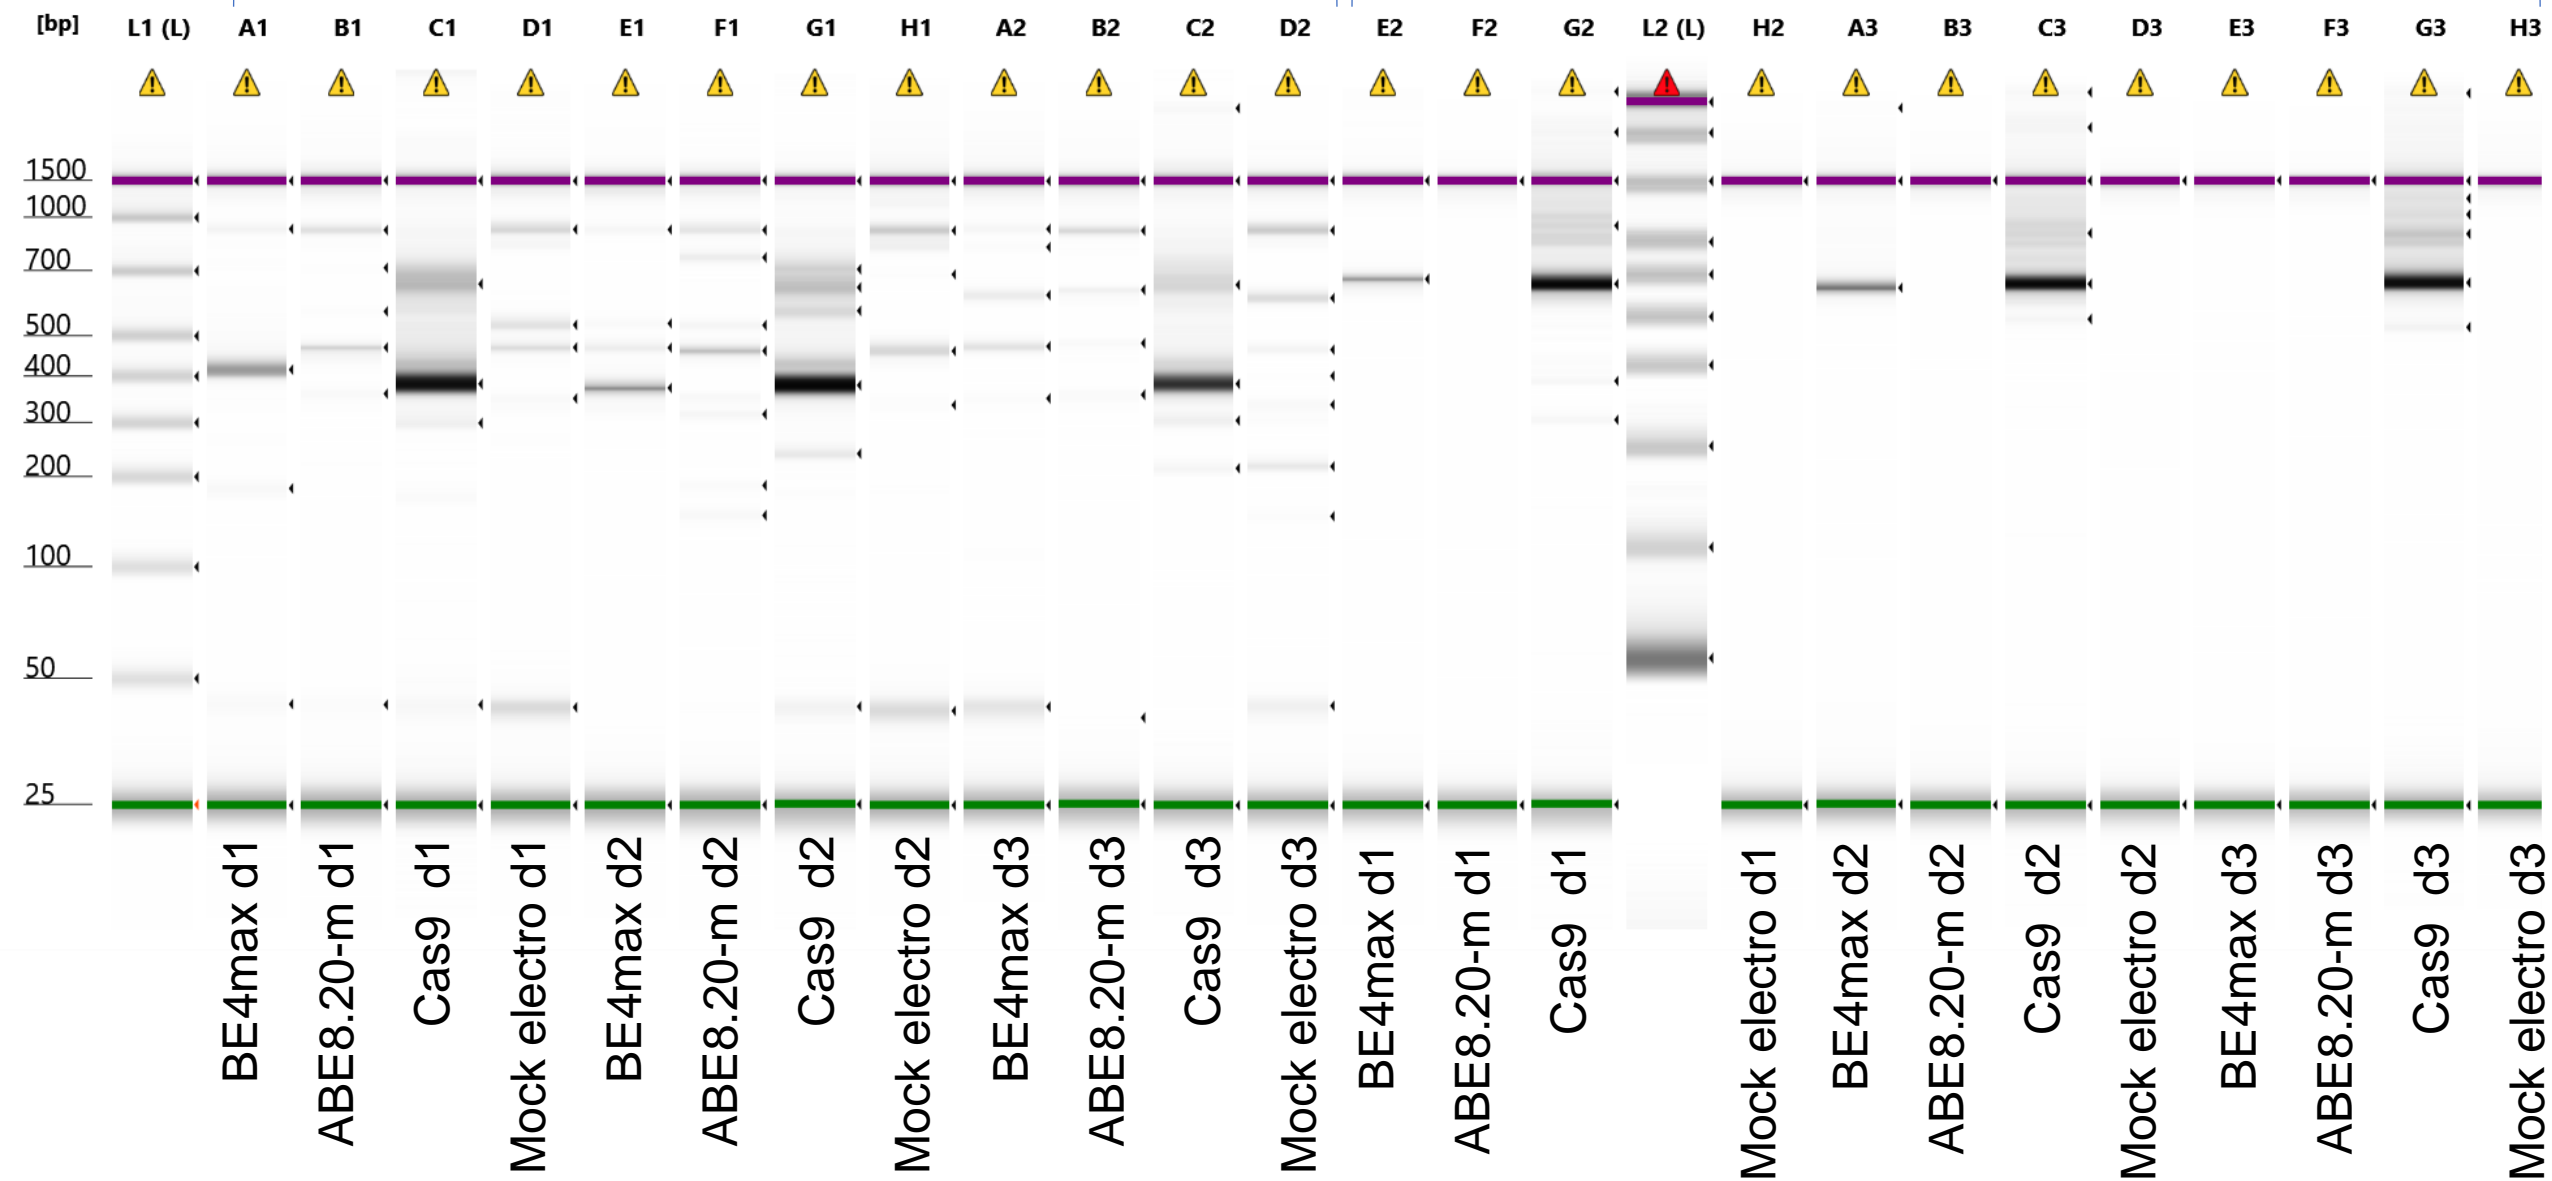

### Interchrom junction #3 Ext Data Fig 1n

### Interchrom junction #4 Ext Data Fig 1o

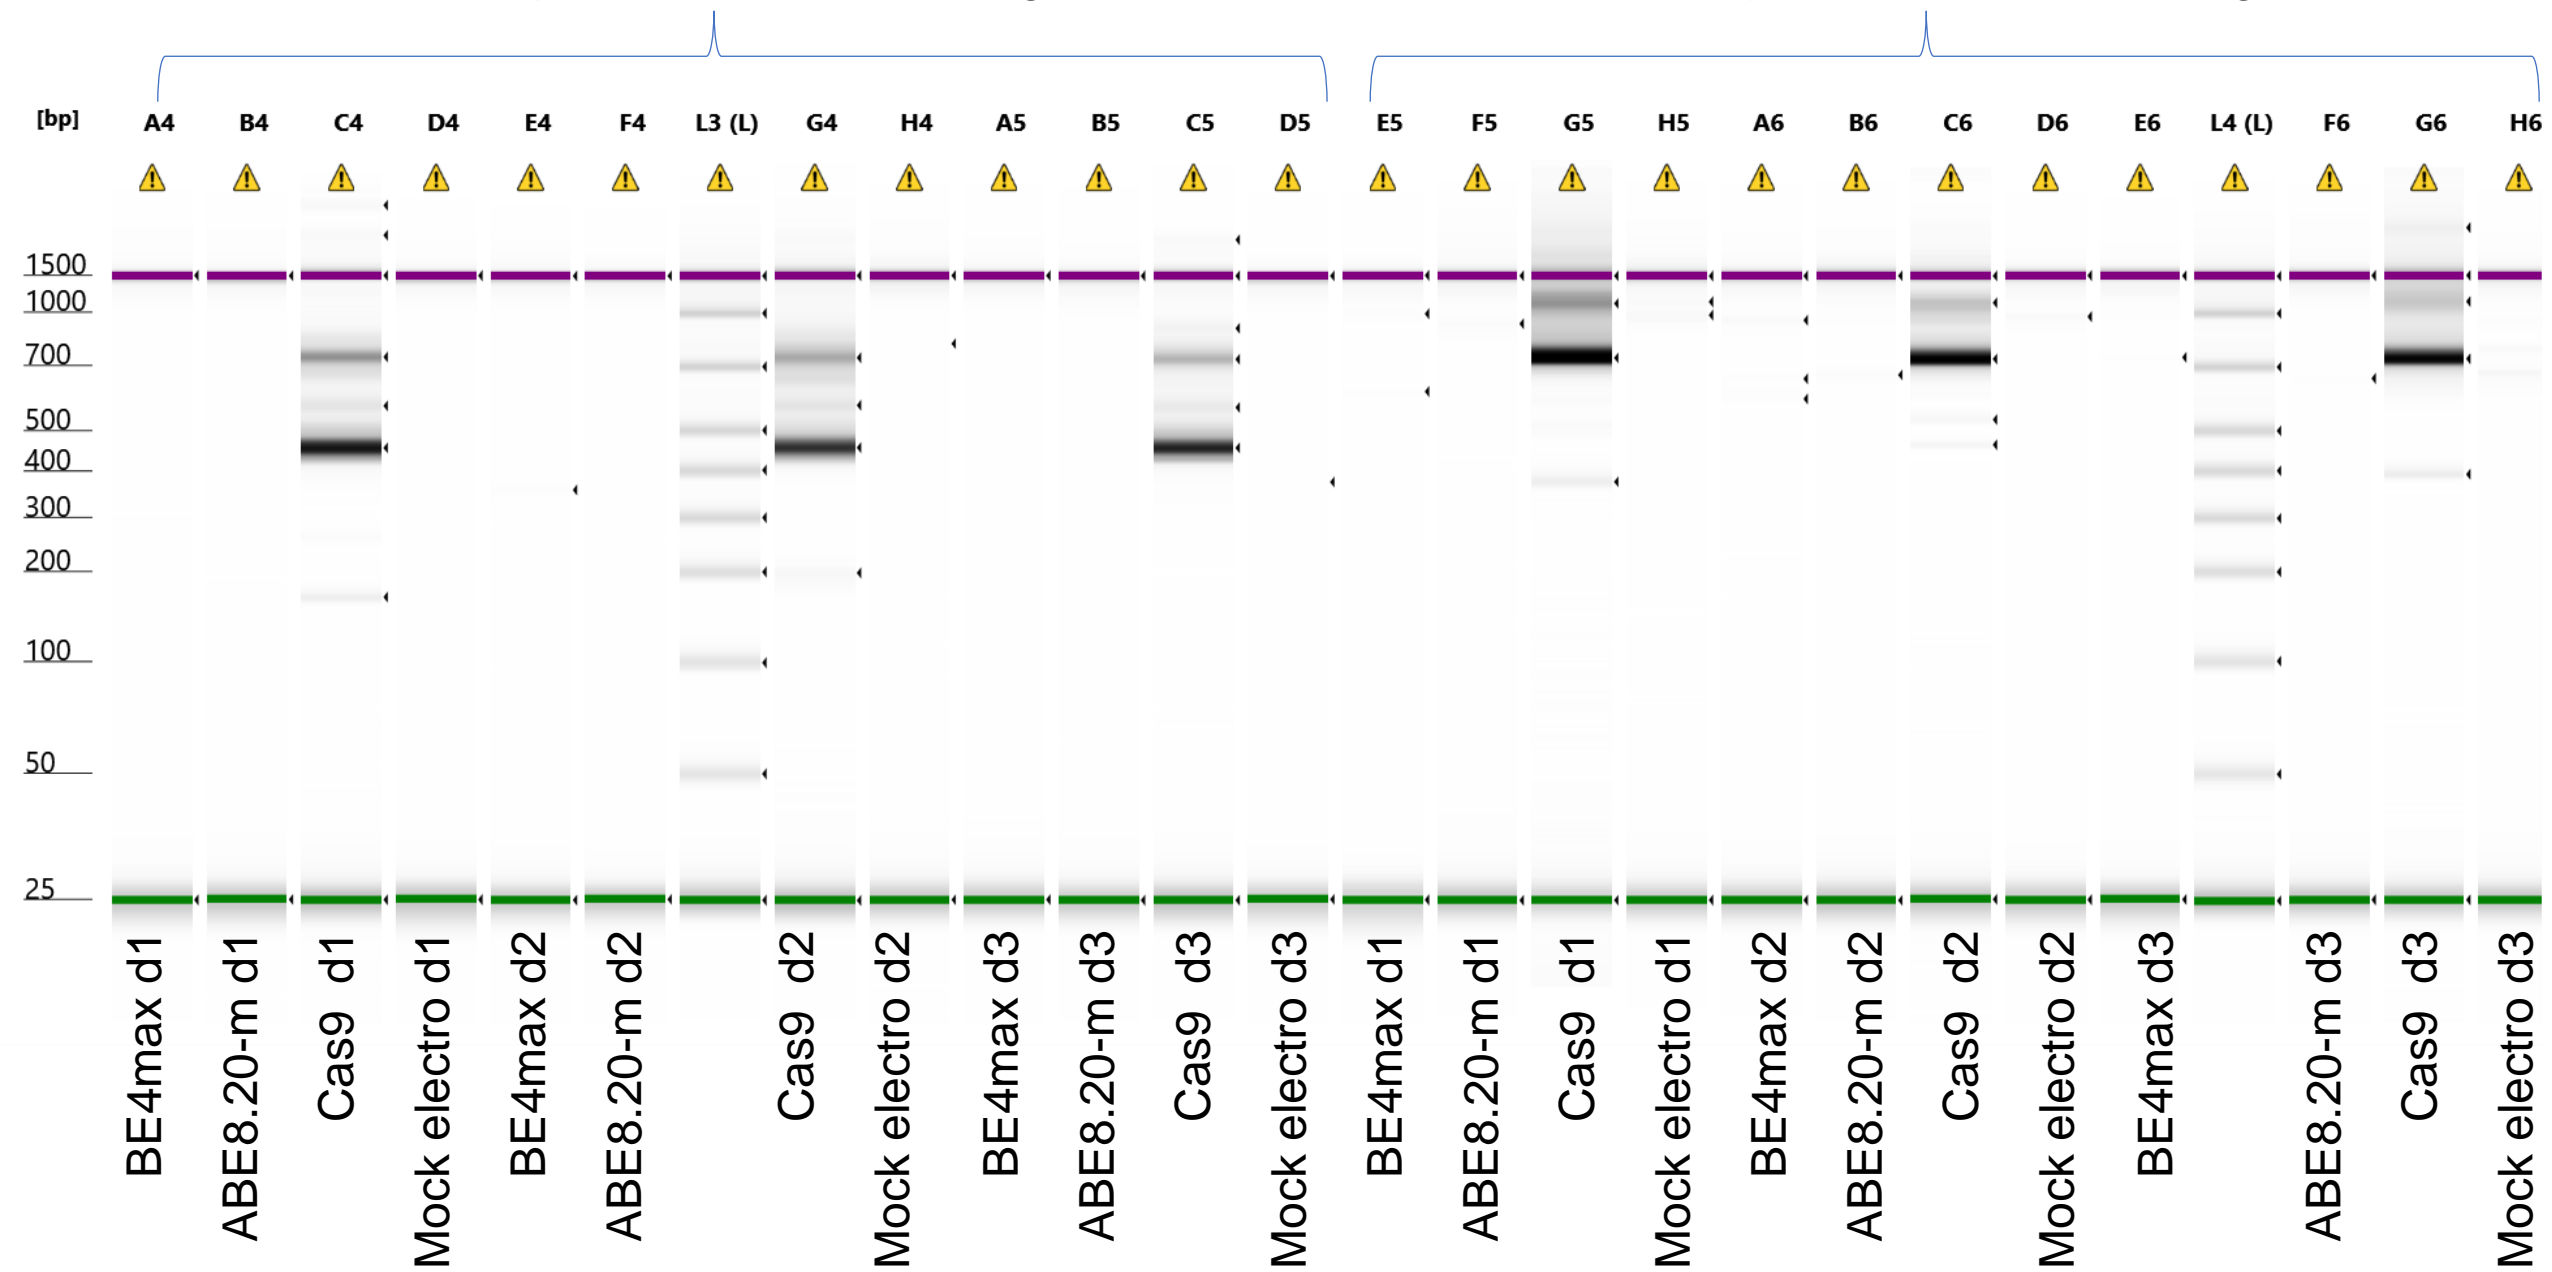



# Interchrom junction #2 Fig 1s bottom (std); Fig 5i (opt)

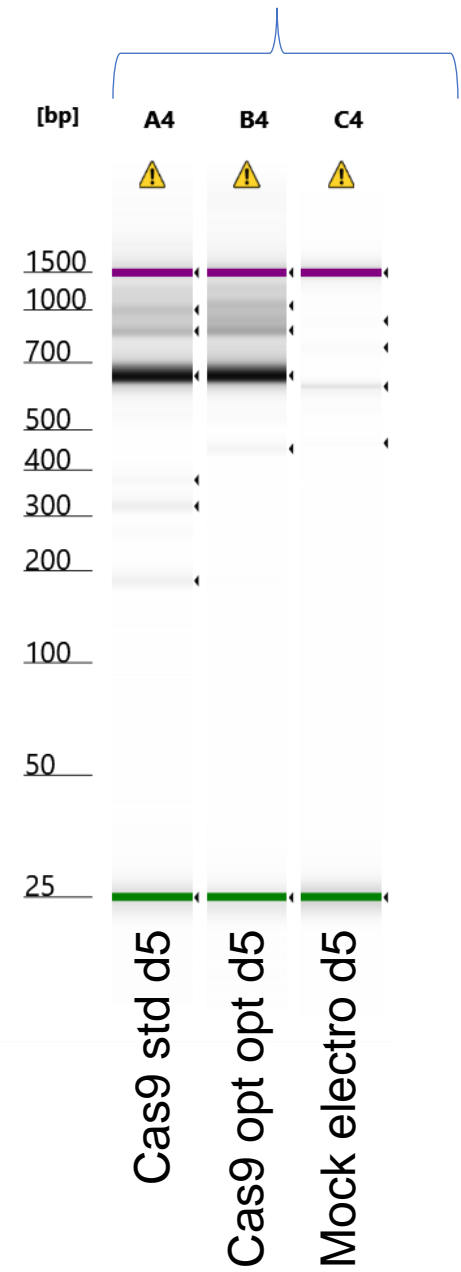

Extended Data figure 4e

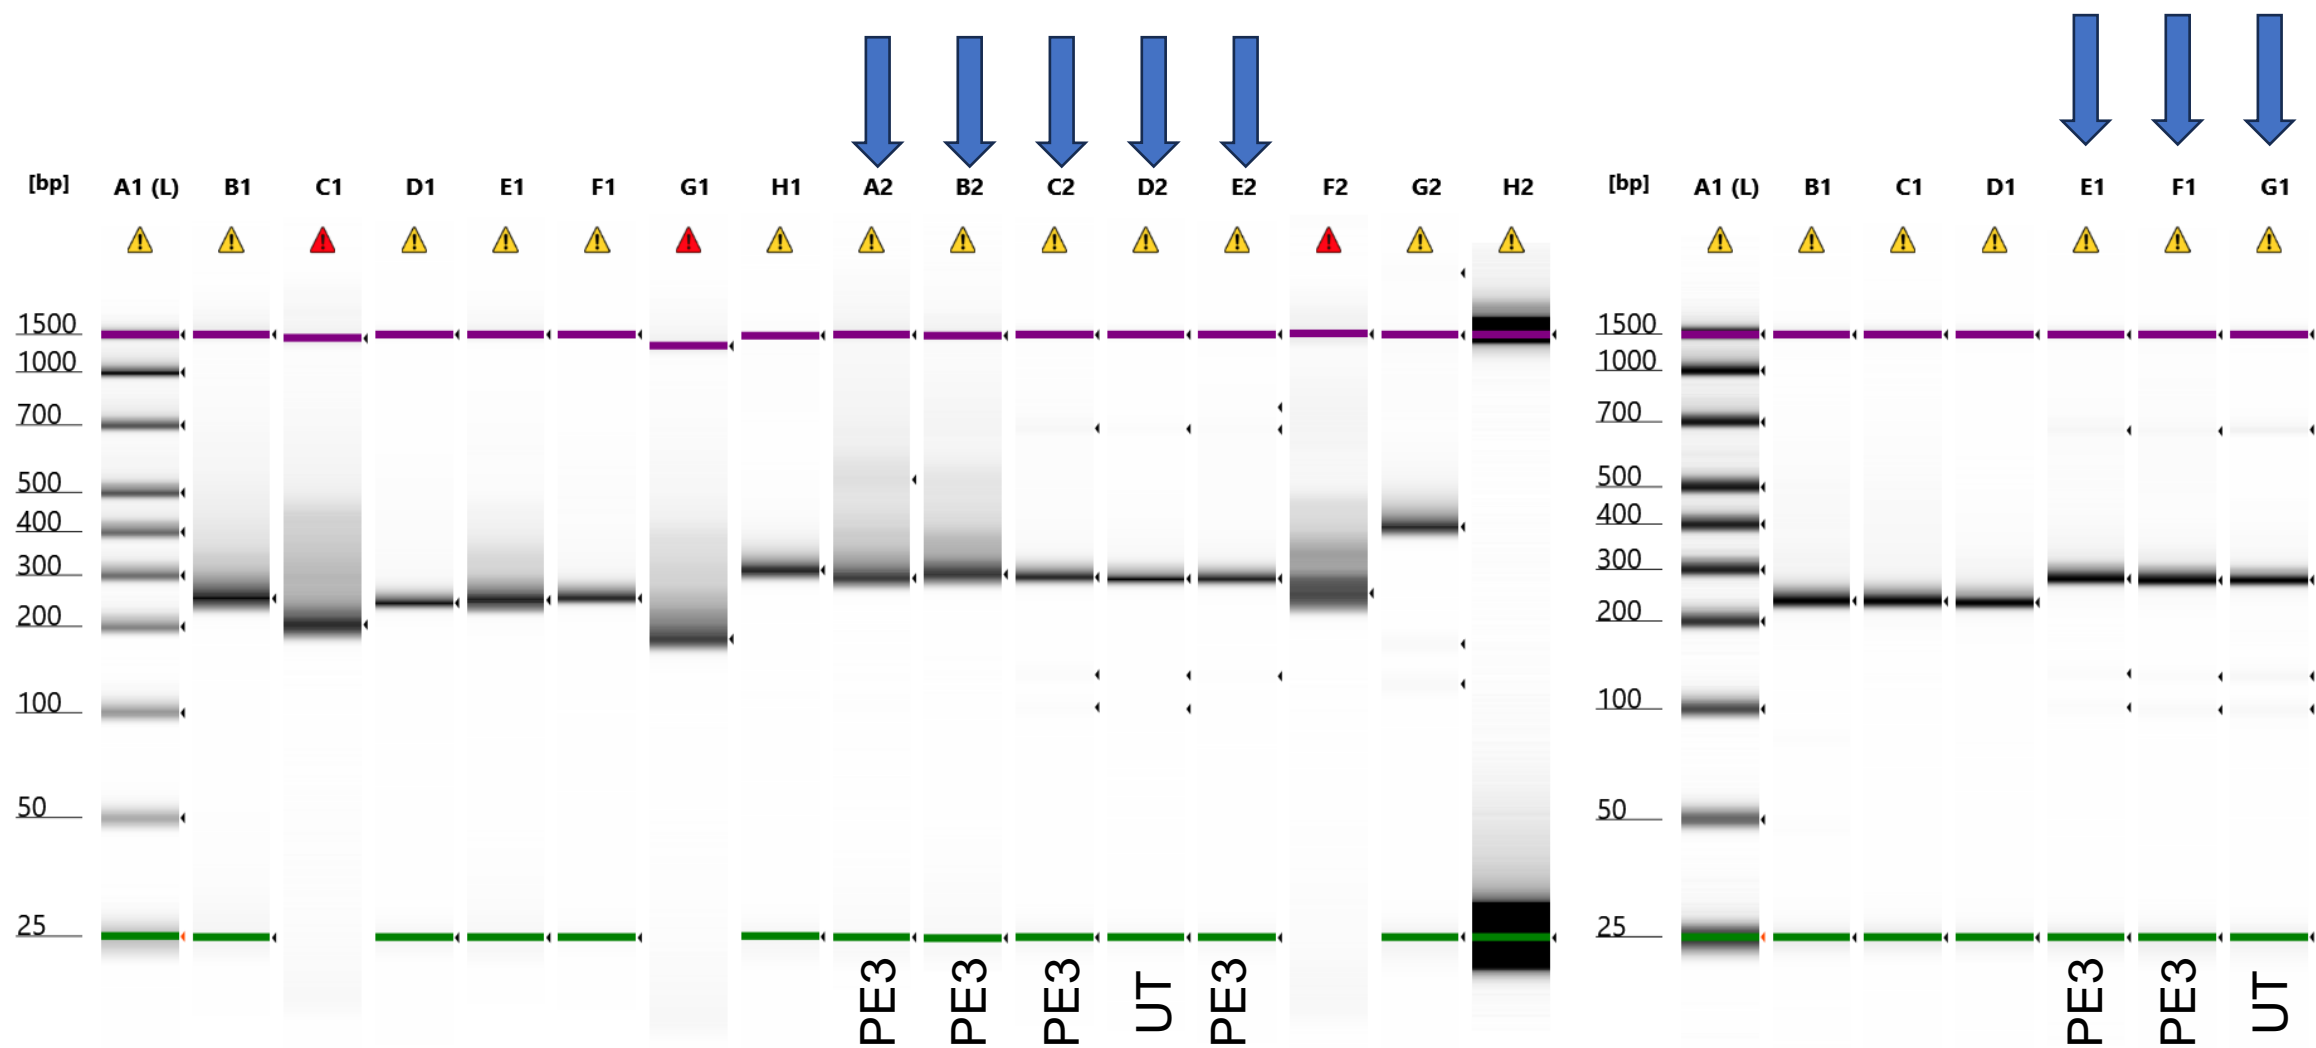

Supplement: 41587_2023_1915_MOESM4_ESM.pdf [file 41587_2023_1915_MOESM4_ESM.pdf]
